# Supplementary material for: Comprehensive metagenomic analysis of glioblastoma reveals absence of known virus despite antiviral-like type I interferon gene response
Source: PubMed Central journal article supplement — Int J Cancer. 2014 May 8;135(6):1381–9. doi: 10.1002/ijc.28670 (PMC4235296; doi:10.1002/ijc.28670), 2014-05-08
Supplement: ijc0135-1381-sd2.pdf [file ijc0135-1381-sd2.pdf]

Suppl Table 2: Semi-quantitative PCR of neurotropic viruses in biopsy specimens and CMV serology

| Sample name                       | CMV Serology (IgM/IgG)        |
|-----------------------------------|-------------------------------|
|                                   | IgM(0.85-1.2);IgG(5-15)       |
| Epileptic 1                       | NEG (0.11)/NEG (0.6)          |
| Epileptic 2                       | NA                            |
| Epileptic 3                       | NA                            |
| Epileptic 4                       | NEG (0.07)/NEG (0.1)          |
| Epileptic 5                       | NA                            |
| GBM 1                             | NA                            |
| GBM 2                             | NA                            |
| GBM 3                             | NA                            |
| GBM 4                             | NA                            |
| GBM 5                             | NEG (0.05)/NEG (0.1)          |
| GBM 6                             | NEG (0.18)/POS (69.9)         |
| GBM 7                             | NEG (0.13)/POS (16.1)         |
| GBM 8                             | NA                            |
| GBM 9                             | NA                            |
| GBM 10                            | NEG (0.09)/POS (130.7)        |
| GBM 11                            | NEG (0.14)/POS (91.4)         |
| GBM 12                            | NEG (0.13) / NEG(0)           |
| GBM 13                            | NEG (0.14) / POS (25.8)       |
| GBM 14                            | NEG (0.09) / NEG (0)          |
| GBM 15                            | NEG (0.16) / POS (11.2)       |
| GBM 16                            | NEG (0.11) / NEG (0)          |
| GBM 17                            | NEG (0.14) / NEG (0)          |
| GBM 18                            | NEG(0.26) / POS (45.0)        |
| GBM 19                            | NEG (0.72) / POS (164.3)      |
| GBM 20                            | NEG (0.23) / POS (96.0)       |
| GBM 21                            | NEG (0.59) / POS (147.7)      |
| GBM 22                            | NEG (0.11) / NEG (0)          |
| GBM 23                            | NEG (0.13) / NEG (0.1)        |
| GBM 24                            | NEG (0.25) / POS (98.6)       |
| GBM 25                            | NEG(0.39) / POS (100.5)       |
| GBM 26                            | Grayzone (0.92) / POS (> 250) |
| GBM 27                            | NEG (0.21) / POS (155.1)      |
| GBM 28                            | NEG (0.09) / NEG (0.2)        |
| GBM 29                            | NEG (0.25) / NEG (0)          |
| GBM 30                            | NEG (0.1) / NEG (0)           |
| GBM 31                            | NEG (0.21) / NEG (0.1)        |
| Oligodendroglioma 1               | NEG (0.06)/NEG (0.5)          |
| Melanoma Brain Metastasis 1       | NEG (0.2)/POS (66.5)          |
| Melanoma Brain Metastasis 2       | NA                            |
| Breast carcinoma Brain Metastasis | NEG (0.36)/POS (156.9)        |
| Astrocytoma grade II A            | NA                            |
| Astrocytoma grade II B            | NA                            |
| Astrocytoma grade III             | NA                            |
| Ependymoma                        | NA                            |
| Meningioma 1                      | NEG (0.15)/NEG (3.3)          |
| Meningioma 2                      | NA                            |
| Schwannoma                        | NA                            |
| Oligoastrocytoma III              | NA                            |

The presence of the following common neurotropic viruses: cytomegalovirus (CMV), Epstein Barr Virus (EBV), herpes simplex virus (HSV), human herpes-6 virus, measles virus, parechovirus, JC virus, enterovirus, and varicella zoster virus were screened in 48 biopsies and none of these viruses were detected via semi-quantitative PCR, with the exception of Meningioma 2, which gave a signal for enterovirus at the limit of detection (39.2 Ct). 16/31 patients had an IgG positive serology in plasma that correspond to the usual recurrence of CMV in the population. NEG: negative; POS: positive; NA: not available.
